# Supplementary material for: Barriers to Community-Based Primary Health Care Delivery in Urban China: A Systematic Mapping Review
Source: Int J Environ Res Public Health. 2022 Oct 4;19(19):12701. doi: 10.3390/ijerph191912701 (PMC9566097; doi:10.3390/ijerph191912701)
Supplement: Supplementary file 1 [file ijerph-19-12701-s001.zip › ijerph-1864544-supplementary.pdf]

**Table S1:** Quality assessment of the included studies using qualitative methods [27].

| Study                  | Critical Appraisal Skills Program Checklist (Yes/Good; Can't tell/Moderate; No/Poor) |                                           |                                                                          |                                                                       |                                                                    |                                                                                      |                                                    |                                              |                                         |                               |
|------------------------|--------------------------------------------------------------------------------------|-------------------------------------------|--------------------------------------------------------------------------|-----------------------------------------------------------------------|--------------------------------------------------------------------|--------------------------------------------------------------------------------------|----------------------------------------------------|----------------------------------------------|-----------------------------------------|-------------------------------|
|                        | Was there a clear statement of the aims of the research?                             | Is a qualitative methodology appropriate? | Was the research design appropriate to address the aims of the research? | Was the recruitment strategy appropriate to the aims of the research? | Was the data collected in a way that addressed the research issue? | Has the relationship between researcher and participants been adequately considered? | Have ethical issues been taken into consideration? | Was the data analysis sufficiently rigorous? | Is there a clear statement of findings? | How valuable is the research? |
| Yue et al. (2020)      | Yes                                                                                  | Yes                                       | Yes                                                                      | Yes                                                                   | Yes                                                                | Yes                                                                                  | Yes                                                | Yes                                          | Yes                                     | Good                          |
| Zhang et al. (2020)    | Yes                                                                                  | Can't tell                                | Yes                                                                      | Yes                                                                   | Yes                                                                | Yes                                                                                  | Yes                                                | Yes                                          | Yes                                     | Good                          |
| Zhao et al. (2019)     | Yes                                                                                  | Can't tell                                | Yes                                                                      | Yes                                                                   | Yes                                                                | No                                                                                   | Yes                                                | Can't tell                                   | Yes                                     | Moderate                      |
| Liang et al. (2019)    | Yes                                                                                  | Yes                                       | Yes                                                                      | Yes                                                                   | Yes                                                                | Yes                                                                                  | Yes                                                | Yes                                          | Yes                                     | Good                          |
| Searle et al. (2019)   | Yes                                                                                  | Yes                                       | Yes                                                                      | Yes                                                                   | Yes                                                                | Can't tell                                                                           | Yes                                                | Yes                                          | Yes                                     | Good                          |
| Zhu et al. (2018)      | Yes                                                                                  | Yes                                       | Yes                                                                      | Yes                                                                   | Yes                                                                | Yes                                                                                  | Yes                                                | Yes                                          | Yes                                     | Good                          |
| Mao et al. (2018)      | Yes                                                                                  | Yes                                       | Yes                                                                      | Yes                                                                   | Yes                                                                | Can't tell                                                                           | Yes                                                | Yes                                          | Yes                                     | Good                          |
| Wu et al. (2017)       | Yes                                                                                  | Can't tell                                | Yes                                                                      | Yes                                                                   | Can't tell                                                         | Can't tell                                                                           | Yes                                                | Yes                                          | Yes                                     | Moderate                      |
| Qian et al. (2017)     | Yes                                                                                  | Yes                                       | Yes                                                                      | Can't tell                                                            | Yes                                                                | Can't tell                                                                           | Yes                                                | Yes                                          | Yes                                     | Good                          |
| Chapman et al. (2016)  | Yes                                                                                  | Yes                                       | Yes                                                                      | Yes                                                                   | Yes                                                                | Can't tell                                                                           | Yes                                                | Yes                                          | Yes                                     | Good                          |
| Wei et al. (2015)      | Yes                                                                                  | Can't tell                                | Yes                                                                      | Can't tell                                                            | Yes                                                                | Yes                                                                                  | Yes                                                | Yes                                          | Yes                                     | Moderate                      |
| Wang et al. (2014)     | Yes                                                                                  | Yes                                       | Yes                                                                      | Yes                                                                   | Yes                                                                | Yes                                                                                  | Yes                                                | Yes                                          | Yes                                     | Good                          |
| McCollum et al. (2014) | Yes                                                                                  | Yes                                       | Yes                                                                      | Can't tell                                                            | Can't tell                                                         | No                                                                                   | Yes                                                | Yes                                          | Yes                                     | Good                          |

**Table S2:** Quality assessment of the included studies using quantitative methods [26].

| Study                   | Downs and Black Score (out of 28*) | Quality level** | Study                     | Downs and Black Score (out of 28*) | Quality level** |
|-------------------------|------------------------------------|-----------------|---------------------------|------------------------------------|-----------------|
| Liu et al. (2021)       | 21                                 | Good            | Li, H. et al. (2017)      | 21                                 | Good            |
| Huang et al. (2021)     | 22                                 | Good            | Zhang et al. (2017)       | 26                                 | Excellence      |
| Zhang et al. (2020)     | 18                                 | Fair            | Wu et al. (2017)          | 27                                 | Excellence      |
| Yao et al. (2020)       | 21                                 | Good            | Wong et al. (2017)        | 21                                 | Good            |
| Xia et al. (2020)       | 22                                 | Good            | Wei et al. (2017)         | 22                                 | Good            |
| Duan et al. (2020)      | 17                                 | Fair            | Ong et al. (2017)         | 19                                 | Fair            |
| Zhang, W. et al. (2020) | 19                                 | Fair            | Li, J. et al. (2016)      | 18                                 | Fair            |
| Zhang, T. et al. (2020) | 22                                 | Good            | Li, H. et al. (2016)      | 19                                 | Fair            |
| Zhang, L. et al. (2020) | 21                                 | Good            | Gu et al. (2016)          | 22                                 | Good            |
| Gu et al. (2020)        | 26                                 | Excellence      | Gan et al. (2016)         | 23                                 | Good            |
| Yin et al. (2019)       | 23                                 | Good            | Chung et al. (2016)       | 21                                 | Good            |
| Sun et al. (2019)       | 19                                 | Fair            | Wu et al. (2016)          | 24                                 | Good            |
| Li ... & Mao. (2019)    | 21                                 | Good            | Jing et al. (2015)        | 20                                 | Good            |
| Li ... & Hu. (2019)     | 22                                 | Good            | Zhong et al. (2015)       | 24                                 | Good            |
| Pu et al. (2019)        | 21                                 | Good            | Li ... Yang et al. (2015) | 22                                 | Good            |
| Huang et al. (2019)     | 20                                 | Good            | Li ... Lao et al. (2015)  | 16                                 | Fair            |
| Zhu et al. (2019)       | 19                                 | Fair            | Kuang et al. (2015)       | 15                                 | Fair            |
| Zhan et al. (2019)      | 21                                 | Good            | Du et al. (2015)          | 19                                 | Fair            |
| Wang et al. (2019)      | 18                                 | Fair            | Zeng et al. (2015)        | 22                                 | Good            |
| Liang et al. (2019)     | 19                                 | Fair            | Shi et al. (2015)         | 24                                 | Good            |
| Huang et al. (2019)     | 17                                 | Fair            | Wang et al. (2014)        | 21                                 | Good            |
| Chen et al. (2019)      | 22                                 | Good            | McCollum et al. (2014)    | 22                                 | Good            |
| Li, W. et al. (2018)    | 23                                 | Good            | Chen et al. (2014)        | 24                                 | Good            |
| Li, L. et al. (2018)    | 26                                 | Excellence      | Li et al. (2014)          | 20                                 | Good            |
| Zhong et al. (2018)     | 22                                 | Good            | Wang et al. (2013)        | 23                                 | Good            |
| Liu, D. et al. (2017)   | 21                                 | Good            | Shao et al. (2013)        | 21                                 | Good            |
| Li, W. et al. (2017)    | 20                                 | Good            | Chung et al. (2013)       | 22                                 | Good            |
| Su et al. (2017)        | 19                                 | Fair            | Wong et al. (2012)        | 19                                 | Fair            |
| Liu, C. et al. (2017)   | 18                                 | Fair            |                           |                                    |                 |

\* In the present version of the checklist we modified the scoring of item 27 that refers to the power of the study. Instead of rating according to an available range of study powers, we rated whether the study or not performed power calculation. Accordingly, the maximum score for item 27 was instead of 5 and thus the highest possible score for the checklist was 28 (instead of 32). \*\* The score ranges were given corresponding quality levels as previously reported [28]: excellent (26-28); good (20-25); fair (15-19); and poor ( $\leq 14$ ).

**Table S3:** A priori review protocol [34].

| Section                      | Item | Checklist item                                                                                                                                                                                                                                                                                                                                                                                                                                                                                                                                                                                                                                                             |
|------------------------------|------|----------------------------------------------------------------------------------------------------------------------------------------------------------------------------------------------------------------------------------------------------------------------------------------------------------------------------------------------------------------------------------------------------------------------------------------------------------------------------------------------------------------------------------------------------------------------------------------------------------------------------------------------------------------------------|
| Title                        |      |                                                                                                                                                                                                                                                                                                                                                                                                                                                                                                                                                                                                                                                                            |
| • Identification             | 1a   | Barriers to Community-Based Primary Health Care Delivery in Urban China: A Systematic Mapping Review                                                                                                                                                                                                                                                                                                                                                                                                                                                                                                                                                                       |
| • Update                     | 1b   | Not applicable                                                                                                                                                                                                                                                                                                                                                                                                                                                                                                                                                                                                                                                             |
| Registration                 | 2    | Not applicable                                                                                                                                                                                                                                                                                                                                                                                                                                                                                                                                                                                                                                                             |
| Authors                      |      |                                                                                                                                                                                                                                                                                                                                                                                                                                                                                                                                                                                                                                                                            |
| • Contact                    | 3a   | Bo Li<br>bo-li.li@connect.polyu.hk<br>Department of Applied Social Sciences, The Hong Kong Polytechnic University, Hung Hom, Kowloon, Hong Kong<br>Juan Chen<br>juan.chen@polyu.edu.hk<br>Department of Applied Social Sciences, The Hong Kong Polytechnic University, Hung Hom, Kowloon, Hong Kong                                                                                                                                                                                                                                                                                                                                                                        |
| • Contributions              | 3b   | Conceptualization, B.L. and J.C.; methodology, B.L. and J.C.; software, B.L.; validation, B.L. and J.C.; formal analysis, B.L. and J.C.; investigation, B.L. and J.C.; resources, B.L. and J.C.; data curation, B.L. and J.C.; writing—original draft preparation, B.L.; writing—review and editing, J.C.; visualization, B.L.; supervision, J.C.; project administration, J.C.; funding acquisition, J.C.                                                                                                                                                                                                                                                                 |
| Amendments                   | 4    | Not applicable                                                                                                                                                                                                                                                                                                                                                                                                                                                                                                                                                                                                                                                             |
| Support                      |      |                                                                                                                                                                                                                                                                                                                                                                                                                                                                                                                                                                                                                                                                            |
| • Sources                    | 5a   | Electronic databases                                                                                                                                                                                                                                                                                                                                                                                                                                                                                                                                                                                                                                                       |
| • Sponsor/funder             | 5b   | The Hong Kong Polytechnic University Mental Health Research Centre (Project ID: P0040455)                                                                                                                                                                                                                                                                                                                                                                                                                                                                                                                                                                                  |
| • Role of sponsor/funder     | 5c   | Proofreading                                                                                                                                                                                                                                                                                                                                                                                                                                                                                                                                                                                                                                                               |
| INTRODUCTION                 |      |                                                                                                                                                                                                                                                                                                                                                                                                                                                                                                                                                                                                                                                                            |
| Rationale                    | 6    | Existing reviews on China's CB-PHC have focused primarily on quality issues, while there has been little synthesis of the barriers to care delivery. This paper aims to fill this gap through a systematic mapping review.                                                                                                                                                                                                                                                                                                                                                                                                                                                 |
| Objective/research questions | 7    | <ul style="list-style-type: none"> <li>Objective: to synthesize selected evidence on the barriers to CB-PHC delivery in urban China and their impact on community-based health care.</li> <li>Research questions: <ul style="list-style-type: none"> <li>What are the barriers to CB-PHC delivery in urban China?</li> <li>What are the impacts of the barriers on community-based health care?</li> </ul> </li> </ul>                                                                                                                                                                                                                                                     |
| METHODS                      |      |                                                                                                                                                                                                                                                                                                                                                                                                                                                                                                                                                                                                                                                                            |
| Eligibility criteria         | 8    | <ul style="list-style-type: none"> <li>Inclusion criteria: peer-reviewed English and Chinese academic journal articles published between 2012 and 2021 (both qualitative and quantitative research).</li> <li>Exclusion criteria: 1) studies using non-empirical data; 2) studies focusing on regions outside mainland China; 3) studies that do not focus on the urban population; 4) studies using data collected before or in 2009; 5) grey literature (e.g., policy documents, consultancy reports, research notes, commentaries, editorials, letters, correspondence); 6) review articles; 7) randomized trials; 8) pilot studies; and 9) study protocols.</li> </ul> |

|                                     |     |                                                                                                                                                                                                                                                                                                                                                                                                                                                                                                                                                                                                                                                                                                                                                                                                                                                                                                                                                                                                                                        |
|-------------------------------------|-----|----------------------------------------------------------------------------------------------------------------------------------------------------------------------------------------------------------------------------------------------------------------------------------------------------------------------------------------------------------------------------------------------------------------------------------------------------------------------------------------------------------------------------------------------------------------------------------------------------------------------------------------------------------------------------------------------------------------------------------------------------------------------------------------------------------------------------------------------------------------------------------------------------------------------------------------------------------------------------------------------------------------------------------------|
| Information sources                 | 9   | Electronic databases (CINAHL, MEDLINE, Scopus, Web of Science, and CNKI) and hand searches of references cited in existing reviews.                                                                                                                                                                                                                                                                                                                                                                                                                                                                                                                                                                                                                                                                                                                                                                                                                                                                                                    |
| Search strategy                     | 10  | <ul style="list-style-type: none"> <li>Terms and queries (Boolean operators and Medical Subject Headings used to instruct our searches and optimize the breadth of searching results): <ul style="list-style-type: none"> <li>On the English databases: ‘China’ OR ‘Chinese’ AND ‘community’ OR ‘community-based’ AND ‘primary care’ OR ‘primary healthcare’ OR ‘primary health care’ AND ‘service delivery’ OR ‘care delivery’ OR ‘delivery of services’ OR ‘delivery of care’ OR ‘access’ OR ‘accessibility’ OR ‘first contact’ OR ‘coordination’ OR ‘comprehensiveness’ OR ‘continuity’ OR ‘safety’ OR ‘facility management’ OR ‘team-based care’ OR ‘supervision’ OR ‘population health management’ OR ‘information systems’ OR ‘monitoring’ OR ‘quality management.’</li> <li>On the Chinese database: ‘中国’ OR ‘我国’ AND ‘社区’ OR ‘社区为本’ OR ‘社区导向’ AND ‘初级保健’ OR ‘初级卫生保健’ OR ‘基层医疗’ OR ‘基层保健’ OR ‘社区医疗’ AND ‘服务提供’ OR ‘服务传递’ OR ‘服务实施.’</li> </ul> </li> <li>The terms and queries were informed by the PHCPI framework.</li> </ul> |
| Study records                       |     |                                                                                                                                                                                                                                                                                                                                                                                                                                                                                                                                                                                                                                                                                                                                                                                                                                                                                                                                                                                                                                        |
| • Data management                   | 11a | EndNote X9 and Microsoft Excel                                                                                                                                                                                                                                                                                                                                                                                                                                                                                                                                                                                                                                                                                                                                                                                                                                                                                                                                                                                                         |
| • Selection process                 | 11b | <ul style="list-style-type: none"> <li>499 articles identified, 113 duplicates removed, titles and abstracts of the 386 remaining articles screened, 300 articles excluded (due to either irrelevance or exclusion criteria), the full text of the 80 articles retrieved and assessed, 13 articles removed after assessment, 67 articles included in the final sample.</li> <li>The selection process was conducted by the authors independently.</li> </ul>                                                                                                                                                                                                                                                                                                                                                                                                                                                                                                                                                                           |
| • Data collection process           | 11c | A predetermined form was used to extract the data. The data collection process was completed by the authors independently.                                                                                                                                                                                                                                                                                                                                                                                                                                                                                                                                                                                                                                                                                                                                                                                                                                                                                                             |
| Data items                          | 12  | <ul style="list-style-type: none"> <li>Outcome variables: barriers to CB-PHC delivery, impacts of the barriers on community-based health care.</li> <li>Characteristics of the articles: years of publication, research methods, study sample, regions under study, and others (specified in Table 1).</li> </ul>                                                                                                                                                                                                                                                                                                                                                                                                                                                                                                                                                                                                                                                                                                                      |
| Outcomes and prioritization         | 13  | See the main text.                                                                                                                                                                                                                                                                                                                                                                                                                                                                                                                                                                                                                                                                                                                                                                                                                                                                                                                                                                                                                     |
| Risk and bias in individual studies | 14  | The Downs and Black and the CASP checklists were used to assess the quality of eligible papers.                                                                                                                                                                                                                                                                                                                                                                                                                                                                                                                                                                                                                                                                                                                                                                                                                                                                                                                                        |
| Data                                |     |                                                                                                                                                                                                                                                                                                                                                                                                                                                                                                                                                                                                                                                                                                                                                                                                                                                                                                                                                                                                                                        |
| Syntheses                           | 15  | Thematic narrative syntheses were performed; close, open, and axial coding were applied; ATLAS.ti (version 9) software was used in data coding and analysis.                                                                                                                                                                                                                                                                                                                                                                                                                                                                                                                                                                                                                                                                                                                                                                                                                                                                           |
| Meta-bias                           | 16  | Not applicable                                                                                                                                                                                                                                                                                                                                                                                                                                                                                                                                                                                                                                                                                                                                                                                                                                                                                                                                                                                                                         |
| Confidence in cumulative evidence   | 17  | Not applicable                                                                                                                                                                                                                                                                                                                                                                                                                                                                                                                                                                                                                                                                                                                                                                                                                                                                                                                                                                                                                         |
